# Supplementary material
Source: Springer Nature journal article supplement (https://www.springermedizin.de/resource/supplementary/13024_2014_532_MOESM2_ESM.pdf/9644330)

**A**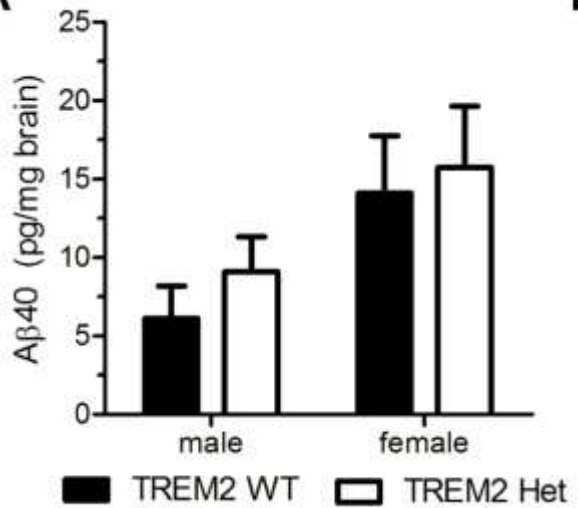**B**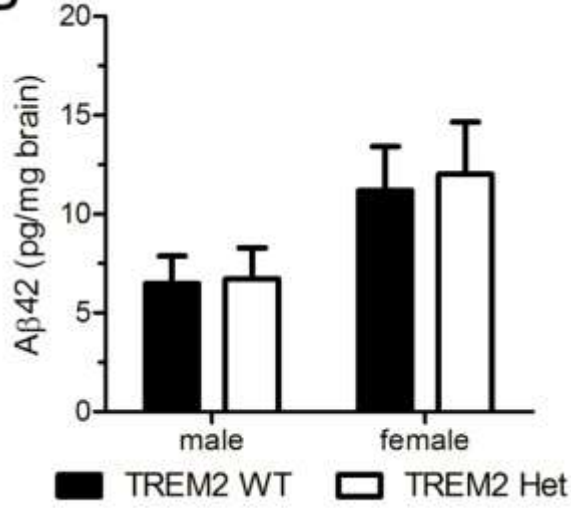

Supplement: MOESM2 [file 9644330]
